# Supplementary material for: A frogspawn inspired twin Mo2C/Ni composite with a conductive fibrous network as a robust bifunctional catalyst for advanced anion exchange membrane electrolyzers
Source: Royal Society of Chemistry journal article supplement (doi:10.1039/d3nr06242b), 2024-01-01
Supplement: d3nr06242b1.pdf [file d3nr06242b1.pdf]

## **Supporting Information**

### **Frogspawn inspired twin Mo<sub>2</sub>C/Ni composite with conductive fibrous network as robust bifunctional catalyst for advanced anion exchange membrane electrolyzers**

Zhongmin Wan<sup>a,b</sup>, Linqing Wang<sup>a,b</sup>, Yuheng Zhou<sup>a,b</sup>, Siyuan Xu<sup>a,b</sup>, Jing Zhang<sup>a,b</sup>, Xi Chen<sup>a,b</sup>, Shi Li<sup>a,b</sup>, Changjie Ou<sup>a,b\*</sup> and Xiangzhong Kong<sup>a,b\*</sup>

<sup>a</sup> College of Mechanical Engineering, Hunan Institute of Science and Technology, Yue yang, 414006, China

<sup>b</sup> Institute of New Energy, Hunan Institute of Science and Technology, Yue yang, 414006, China

\* Corresponding author: xzhkong@hotmail.com, ouchangjie06@163.com

### Scherrer equation

The average particle size of the grains was calculated according to the **Equation S1**.

$$D = \frac{k\lambda}{\beta \cos \theta} \quad (1)$$

In equation S1,  $k$  is the scherrer constant (0.9),  $\lambda$  is the X-ray wavelength (0.15406 nm),  $\beta$  is the half width of the diffraction peak,  $\theta$  is the diffraction angle.

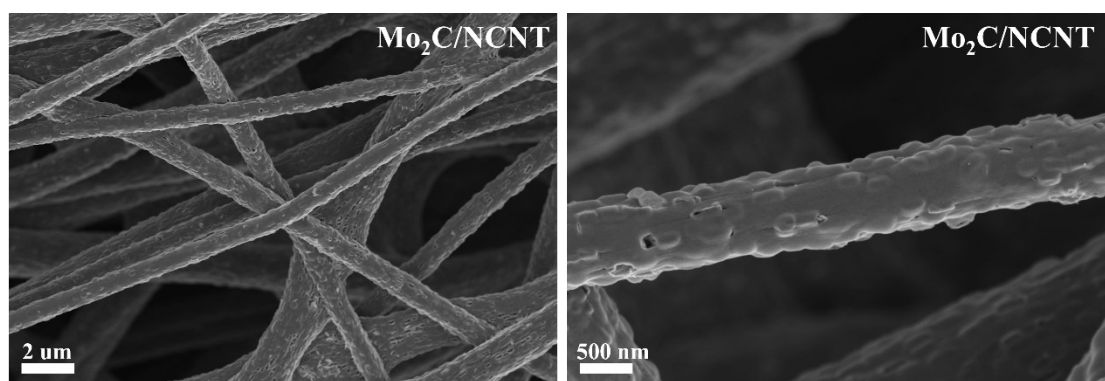

**Figure S1.** SEM image of the Mo<sub>2</sub>C/NCNTs.

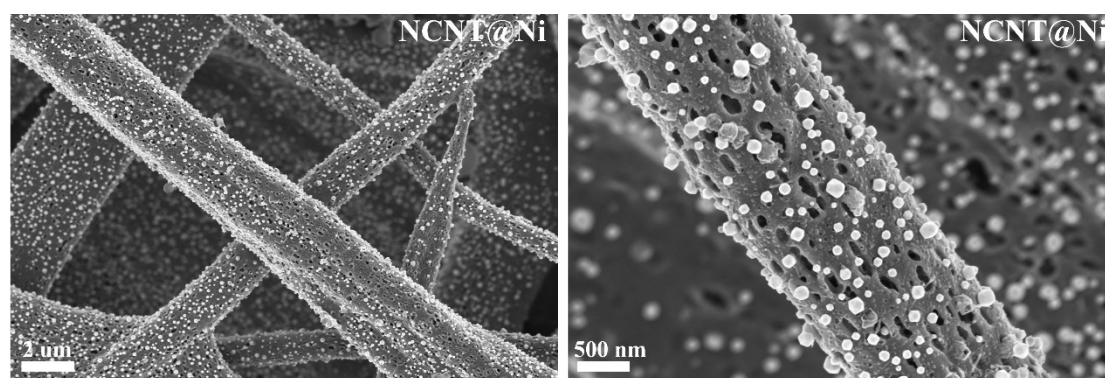

**Figure S2.** SEM image of the NCNTs@Ni.

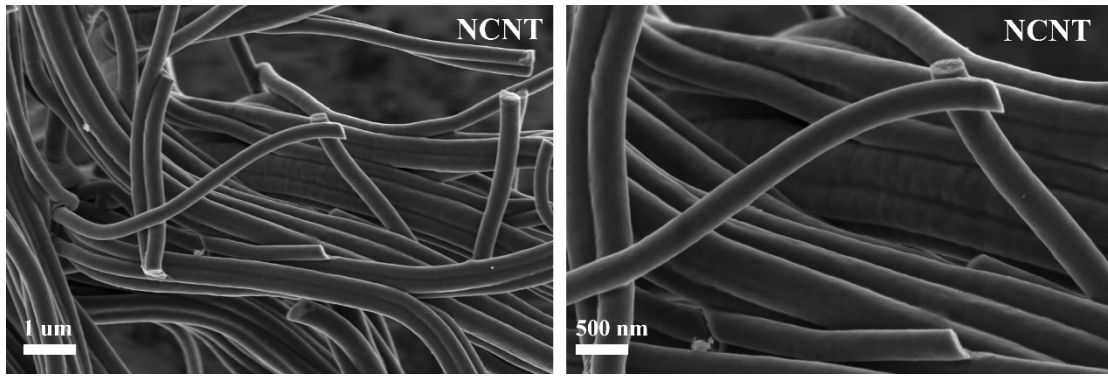

**Figure S3.** SEM image of the NCNTs.

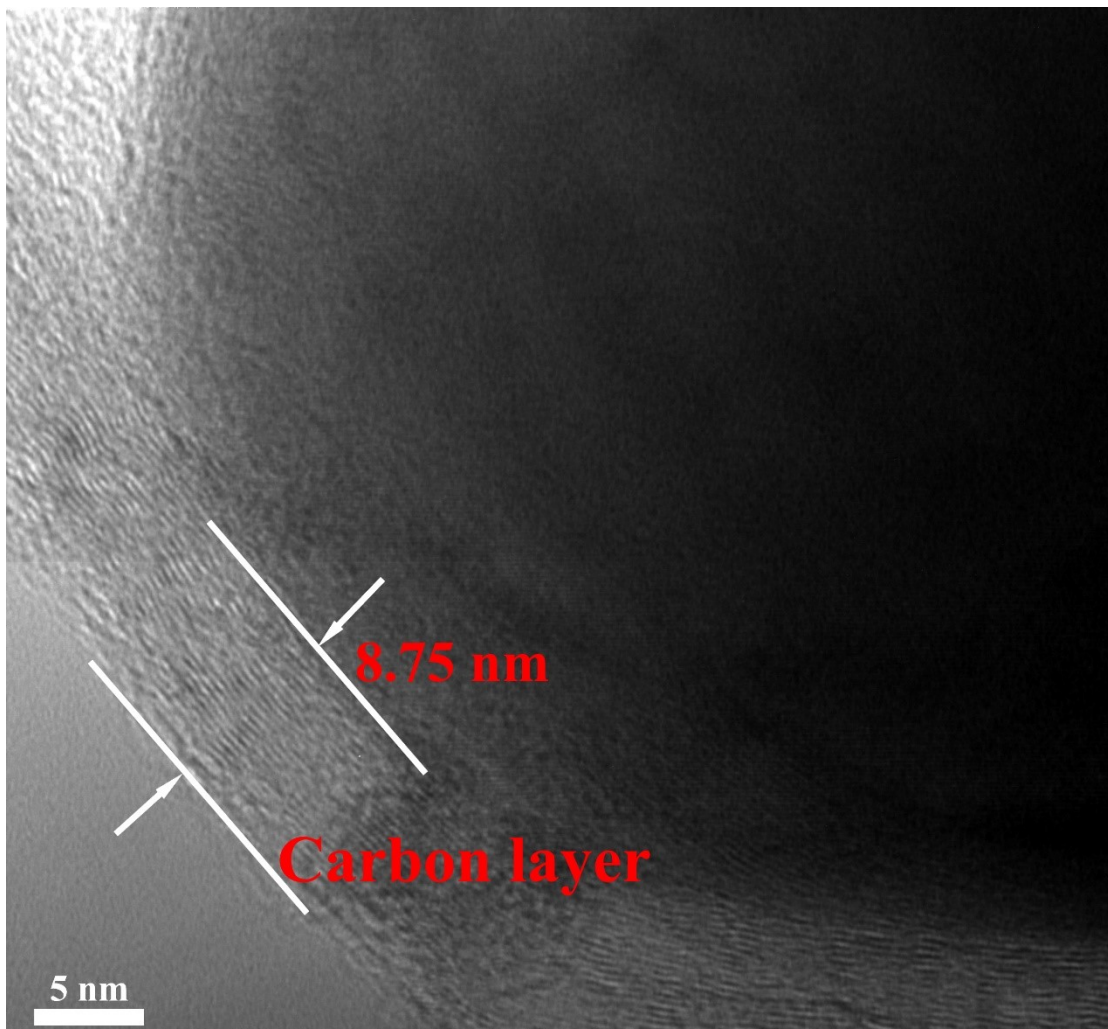

**Figure S4.** HAADF-STEM image of the Mo<sub>2</sub>C/NCNTs@Ni.

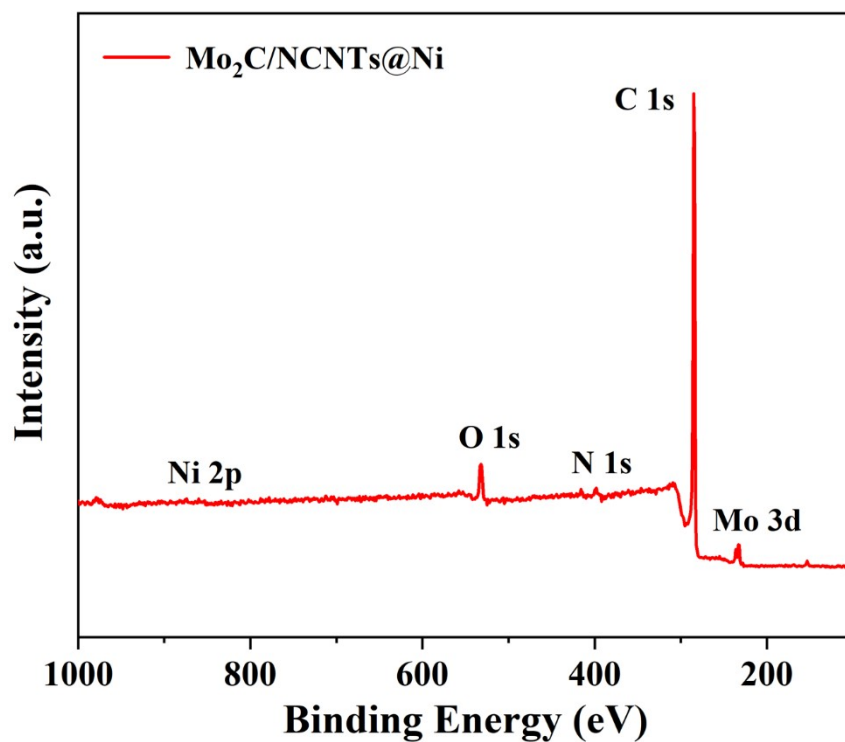

**Figure S5.** XPS full scan of the Mo<sub>2</sub>C/NCNTs@Ni.

**Table S1.** Calculated  $R_{ct}$  values of the samples based on equivalent circuit models.

| sample                     | $R_{ct}$ ( $\Omega$ ) |
|----------------------------|-----------------------|
| Mo <sub>2</sub> C/NCNTs@Ni | 5.31                  |
| Mo <sub>2</sub> C/NCNTs    | 8.20                  |
| NCNTs@Ni                   | 6.98                  |

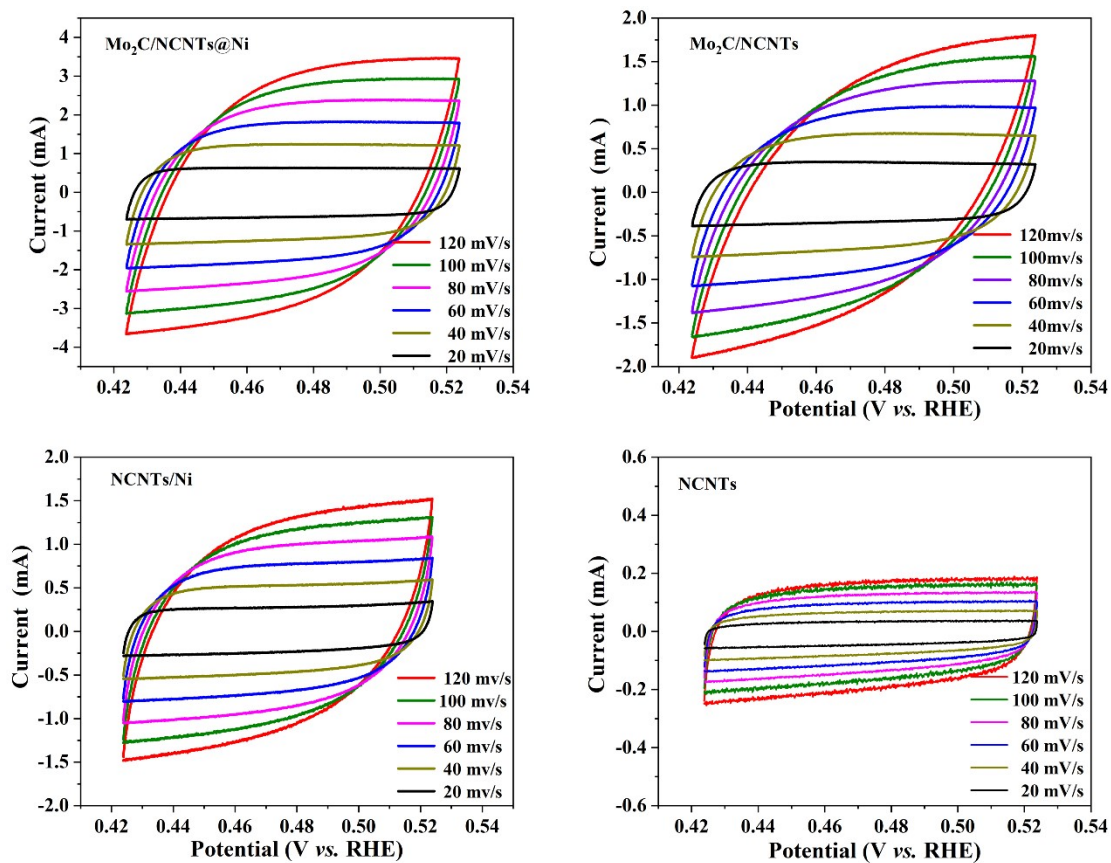

**Figure S6.** Cyclic voltammograms at different scan rates. (a)  $\text{Mo}_2\text{C}/\text{NCNTs}@Ni$ . (b)  $\text{Mo}_2\text{C}/\text{NCNTs}$ . (c)  $\text{NCNTs}@Ni$ . (d)  $\text{NCNTs}$ .

**Table S2.** Calculated  $R_{ct}$  values of the samples based on equivalent circuit models.

| sample                                | $R_{ct}$ ( $\Omega$ ) |
|---------------------------------------|-----------------------|
| $\text{Mo}_2\text{C}/\text{NCNTs}@Ni$ | 4.73                  |
| $\text{Mo}_2\text{C}/\text{NCNTs}$    | 6.49                  |
| $\text{NCNTs}@Ni$                     | 6.43                  |

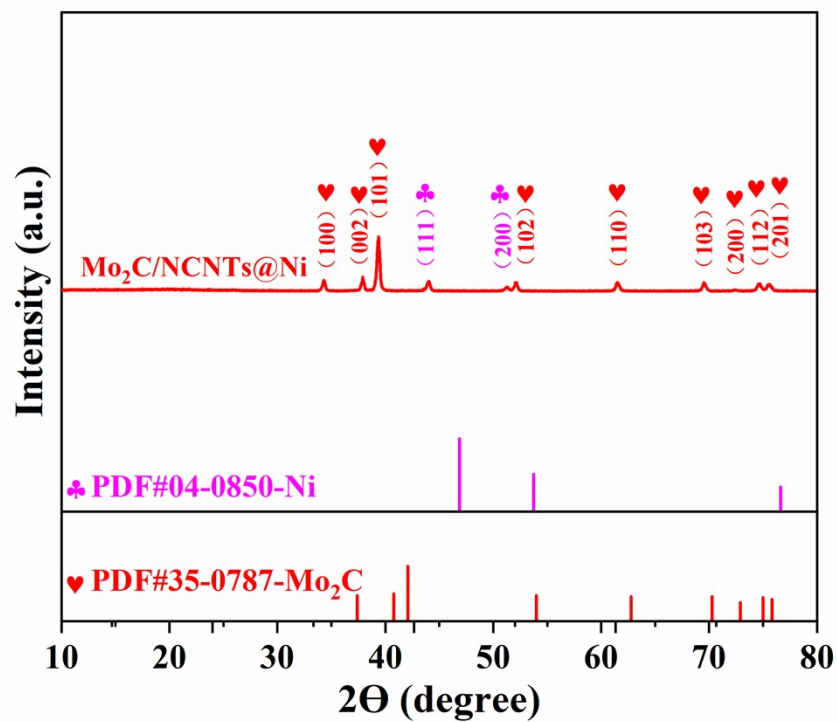

**Figure S7.** XRD patterns of the  $\text{Mo}_2\text{C}/\text{NCNTs}@Ni$  after the HER durability test.

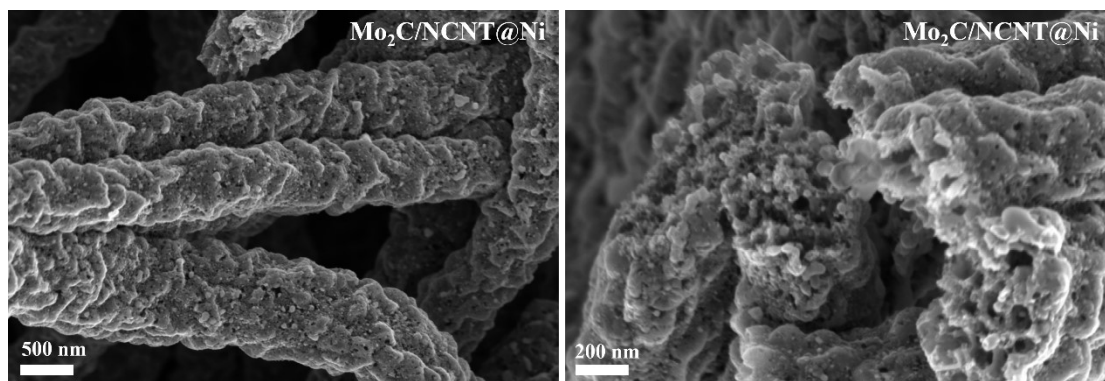

**Figure S8.** SEM image of the  $\text{Mo}_2\text{C}/\text{NCNTs}@Ni$  after the HER durability test.

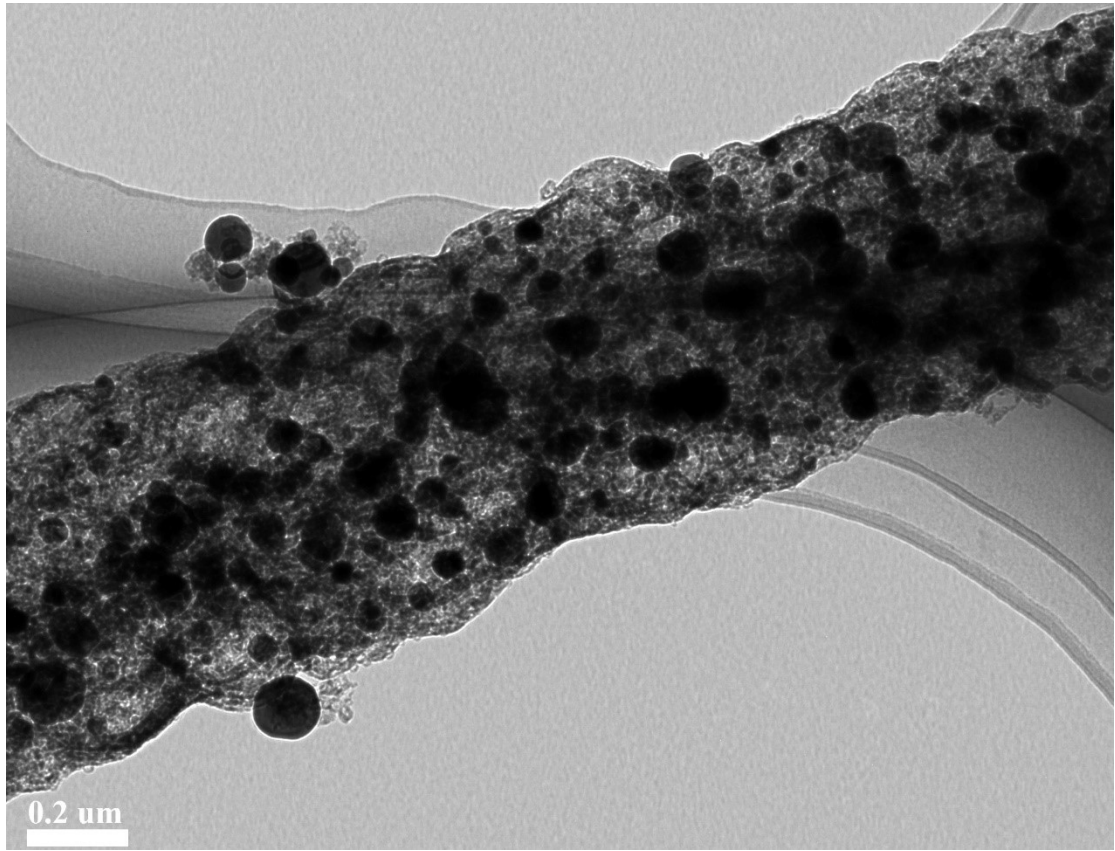

**Figure S9.** SEM image of the Mo<sub>2</sub>C/NCNTs@Ni after the HER durability test.



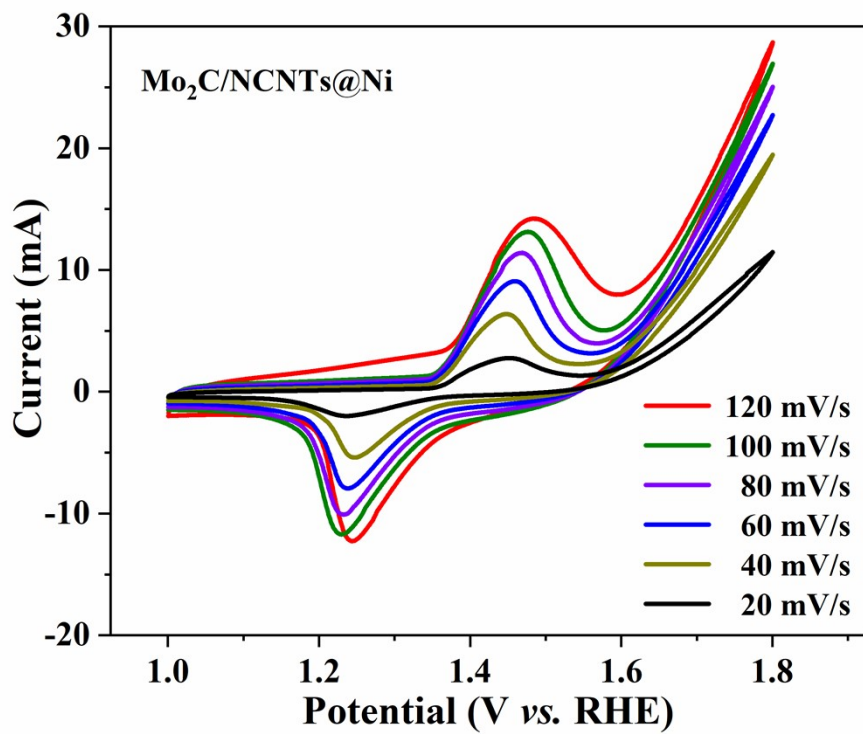

**Figure S10.** CVs for Mo<sub>2</sub>C/NCNTs@Ni in the faradic capacitance current range at scan rates from 20 to 120 mV s<sup>-1</sup>.



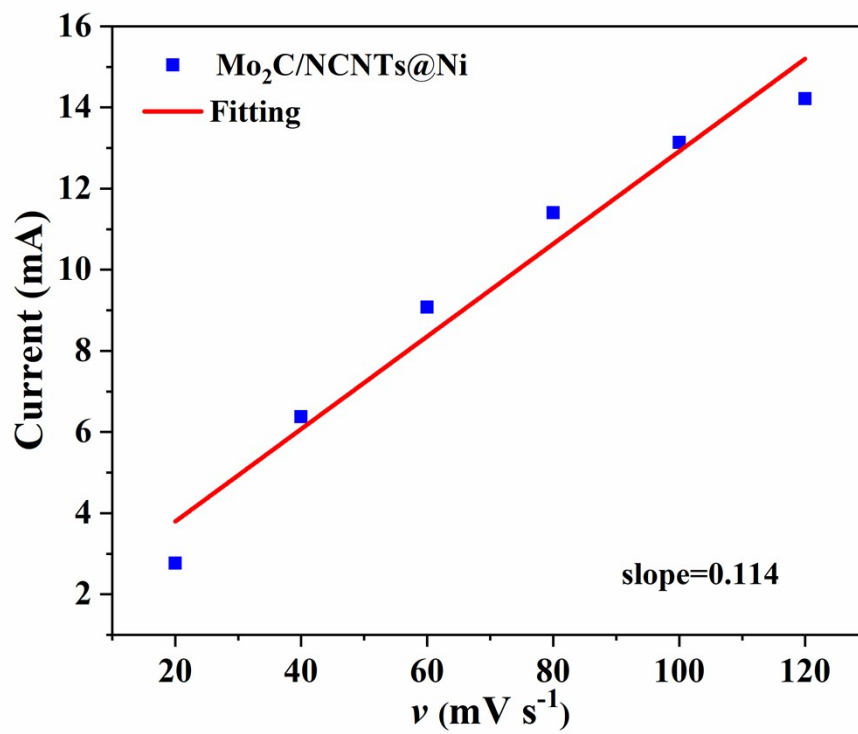

**Figure S11.** The corresponding plot of oxidation peak current versus the scan rate from CV test.

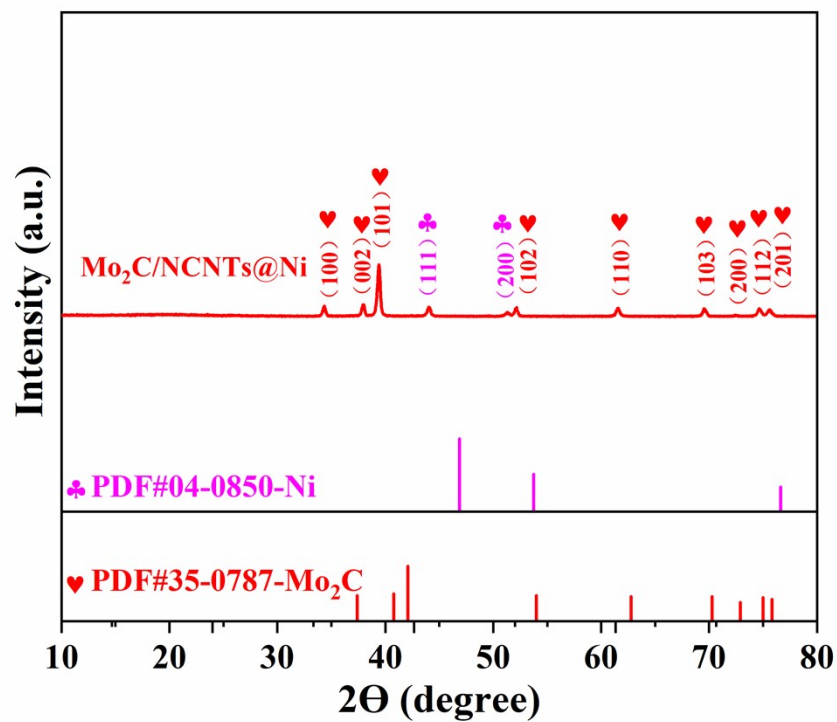

**Figure S12.** XRD patterns of the  $\text{Mo}_2\text{C}/\text{NCNTs@Ni}$  after the OER durability test.

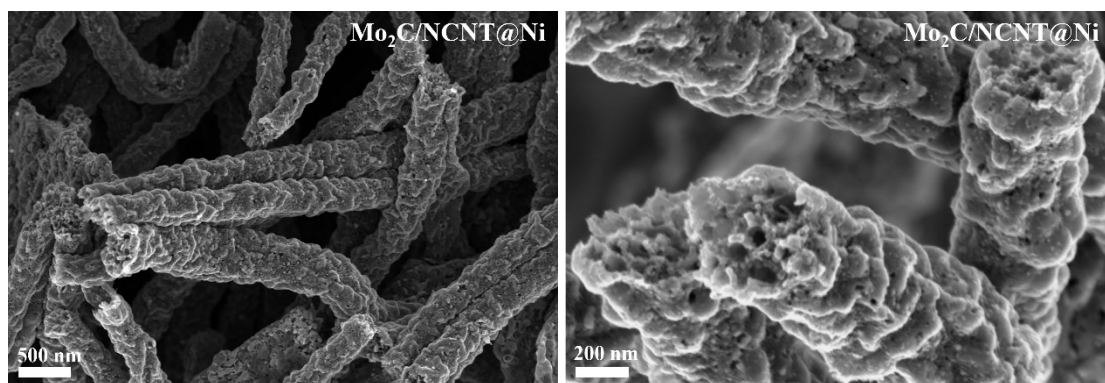

**Figure S13.** SEM image of the  $\text{Mo}_2\text{C}/\text{NCNTs@Ni}$  after the OER durability test.

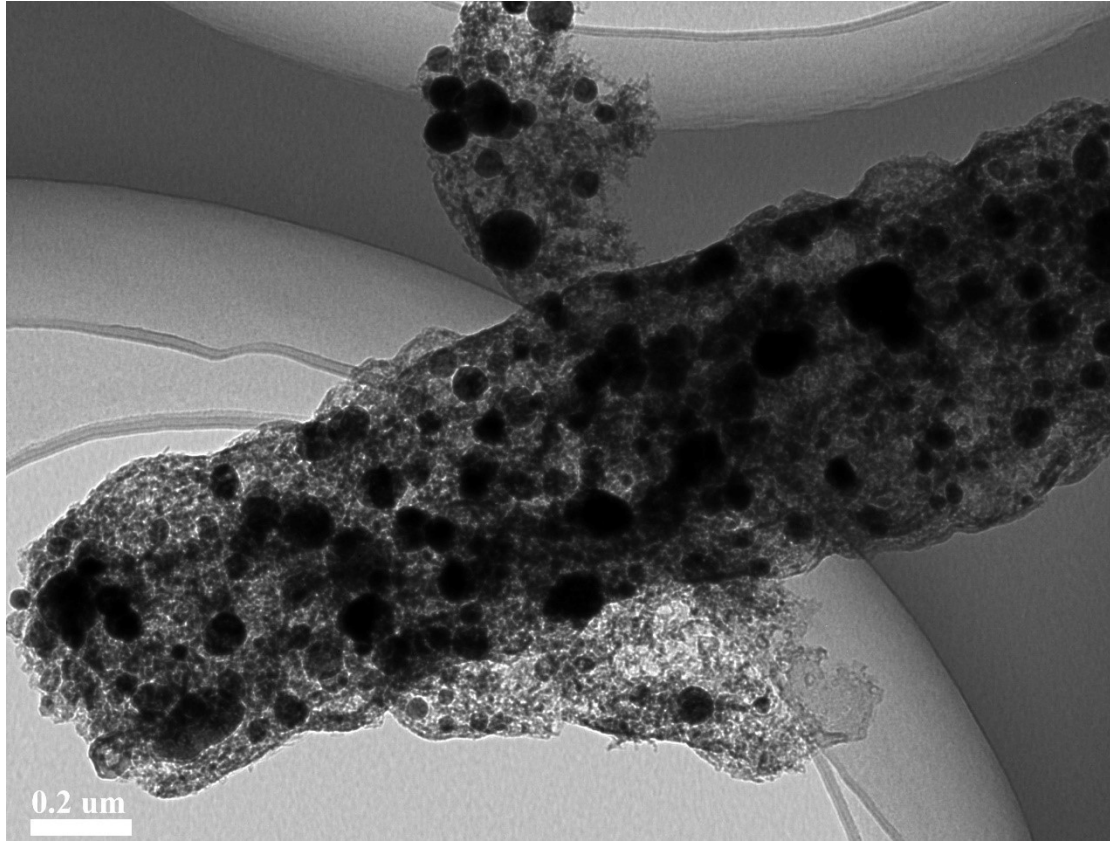

**Figure S14.** SEM image of the Mo<sub>2</sub>C/NCNTs@Ni after the OER durability test.

**Table S3.** Activity comparison of AEM water electrolysis.

| Catalyst                                                                          | Temperature         | Activity                           | Ref.      |
|-----------------------------------------------------------------------------------|---------------------|------------------------------------|-----------|
| Mo <sub>2</sub> C/NCNTs@Ni  <br>Mo <sub>2</sub> C/NCNTs@Ni                        | room<br>temperature | 82.5 mA cm <sup>-2</sup> at 1.99 V | This work |
| Co-Mo <sub>2</sub> C@NC  Co-<br>Mo <sub>2</sub> C@NC                              | room<br>temperature | 10 mA cm <sup>-2</sup> at 1.83 V   | 1         |
| Nickel nanopowders<br>  Li <sub>0.21</sub> Co <sub>2.79</sub> O <sub>4</sub>      | 45°C                | 300 mA cm <sup>-2</sup> at 2.05 V  | 2         |
| Ni/CP  Ni/CP                                                                      | 50°C                | 150 mA cm <sup>-2</sup> at 1.9 V   | 3         |
| Co <sub>3</sub> O <sub>4</sub> eCuO  Ni                                           | 40°C                | 92.11 mA cm <sup>-2</sup> at 2 V   | 4         |
| CuCoO <sub>x</sub>   Ni/(CeO <sub>2</sub> -<br>La <sub>2</sub> O <sub>3</sub> )/C | 60°C                | 74 mA cm <sup>-2</sup> at 2 V      | 5         |
| Cu <sub>0.7</sub> Co <sub>2.3</sub> O <sub>4</sub>   Pt                           | 25 °C               | 73.33 mA cm <sup>-2</sup> at 2 V   | 6         |
| Cu <sub>x</sub> Mg <sub>0.9-x</sub><br>Co <sub>2.1</sub> O <sub>4</sub>   Pt      | 40°C                | 66.67 mA cm <sup>-2</sup> at 2 V   | 7         |
| SG-LSFN-0.5  Pt/C                                                                 | room<br>temperature | 100 mA cm <sup>-2</sup> at 1.89 V  | 8         |

## References:

1. M. Wang, S. Dipazir, P. Lu, Y. Wang, M. Yuan, S. Li and G. Zhang, *J. Colloid Interf. Sci.*, 2018, **532**, 774-781.
2. X. Wu and K. Scott, *Int. J. Hydrogen Energy*, 2013, **38**, 3123-3129.
3. S. H. Ahn, B.-S. Lee, I. Choi, S. J. Yoo, H.-J. Kim, E. Cho, D. Henkensmeier, S. W. Nam, S.-K. Kim and J. H. Jang, *Appl. Catal. B-Environ.*, 2014, **154-155**, 197-205.
4. E. López-Fernández, J. Gil-Rostra, J. P. Espinós, A. R. González-Elipe, F. Yubero and A. de Lucas-Consuegra, *J. Power Sources*, 2019, **415**, 136-144.
5. L. Zeng and T. S. Zhao, *J. Power Sources*, 2016, **303**, 354-362.
6. X. Wu and K. Scott, *J. Mater. Chem.*, 2011, **21(33)**, 12344-12351.
7. A. El-Trass, H. ElShamy, I. El-Mehasseb and M. El-Kemary, *Appl. Surf. Sci.*, 2012, **258**, 2997-3001.
8. L. Li, Z. Zheng, J. Li, Y. Mu, Y. Wang, Z. Huang, Y. Xiao, H. Huang, S. Wang, G. Chen and L. Zeng, *Small*, 2023, **19**, e2301261.
